# Supplementary material for: How should we measure physical activity after stroke? An international consensus
Source: PubMed Central journal article supplement (PMC10614172; doi:10.1177/17474930231184108), 2023-06-24
Supplement: sj-pdf-2-wso-10.1177_17474930231184108.pdf [file sj-pdf-2-wso-10.1177_17474930231184108.pdf]

# Supplementary File 1 - Surveys

## Stroke Survivor & Carer Survey

### Physical Activity Questions

Which statement best describes you?

- I am a Stroke Survivor  
 I am a Carer of a Stroke Survivor

What physical activity information is important to stroke survivors, and why? (eg. The number of steps you take each day, the amount of time you spend doing moderate-intensity activity etc)

\_\_\_\_\_

What physical activity information is important to measure in stroke research and why?

\_\_\_\_\_

What physical activity information is important to measure in stroke rehabilitation, and why?

\_\_\_\_\_

Are you aware of any ways of measuring physical activity after stroke? If so, please provide details.

\_\_\_\_\_

What should researchers consider when selecting how to measure physical activity after stroke? (eg. whether or not the device is comfortable to wear)

\_\_\_\_\_

What should clinicians / therapists consider when selecting how to measure physical activity after stroke? (eg. whether or not the device is comfortable to wear)

\_\_\_\_\_

## Now for some questions about you

How old are you?

- < 30
- 30-40
- 41-50
- 51-60
- >60
- prefer not to say

What is your gender?

- M
- F
- Other
- Prefer not to say

What is your country of residence?

\_\_\_\_\_

How long is it since you had your stroke / the person you care for had a stroke?

- < 1 year
- 1-5 years
- 5-10 years
- 10-20 years
- >20 years

Are you / the person you care for able to walk?

- yes
- no

Do you / the person you care for use a walking aid?

- yes
- no

If you would like to be informed of the study results, please provide your name and email address.

\_\_\_\_\_

## Survey 1 - Researchers & Clinicians

### Demographics - First for some information about you

How old are you?

- < 30
- 31-40
- 41-50
- 51-60
- >60
- Prefer not to say

What is your gender?

- M
- F
- Other
- Prefer not to say

What is your country of residence?

\_\_\_\_\_

What is your profession?

\_\_\_\_\_

What is your highest level of qualification? eg. PhD, BPhysio

\_\_\_\_\_

How many years have you been working as a stroke physical activity researcher?

- < 5
- 5-10
- 11-20
- >20

How many papers have you published in the field?

- 0-5
- 5-10
- 11-20
- >20

## Physical Activity Questions

**The following questions relate to the measurement of post-stroke physical activity outcomes for research purposes. Please consider both devices and questionnaires or surveys in your responses. You may or may not wish to specify different answers for each.**

Which physical activity outcomes are important to measure in stroke research and why? Eg. Step count; weekly minutes of moderate physical activity

---

What measurement tools exist to measure physical activity post stroke? Please consider both devices and questionnaires or surveys. Please provide details of the tools.

---

**The following questions will ask you to identify key elements to consider in post stroke physical activity measurement for research purposes related to six categories. Please identify all key elements that you think may be relevant. Please consider both devices and questionnaires or surveys in your responses. You may or may not wish to specify different answers for each.**

What are the key elements to consider for measuring physical activity post stroke when thinking about the measurement tool's construct validity? (Does the tool measure what it is intended to measure?) Eg. Can you remotely monitor physical activity? Can you determine what types of physical activity are performed?

---

What are the key elements to consider for measuring physical activity post stroke when thinking about responsiveness & sensitivity? (ability to detect change) Eg. epoch length; can it measure change in activity levels?

---

What are the key elements to consider for measuring physical activity post stroke when thinking about reliability? (consistent and free from errors) Eg. duration of measurement; recall issues

---

What are the key elements to consider for measuring physical activity post stroke when thinking about feasibility? Eg cost; time to complete

---

What are the key elements to consider for measuring physical activity post stroke when thinking about the ability to run statistical analyses? Eg. what scales of measurement do the data represent?

---

What are the key elements to consider for measuring physical activity post stroke when thinking about relevance to the International Classification of Functioning and Disability model (ICF model)? Eg. ability to truly measure participation; does the change reflect changes in body structure?

---

Are there any other considerations for measuring physical activity in stroke research?

---



Has physical activity been measured for a sufficient duration to represent habitual physical activity?

Is it valid for multiple countries / settings / cultures?

Can it measure the components of physical activity such as frequency, intensity and duration?

---

Can you please provide a rationale for the item you ranked as most important for "Relevance of the measurement tool's intended purpose to its intended use (construct validity)."

---

**For the category "Responsiveness & Sensitivity" please rank the following considerations from most important ("1") to least important ("5") for physical activity measurement in stroke research.**

|                                                     | 1 Most important      | 2                     | 3                     | 4                     | 5 Least important     |
|-----------------------------------------------------|-----------------------|-----------------------|-----------------------|-----------------------|-----------------------|
| Is the epoch length appropriate?                    | <input type="radio"/> | <input type="radio"/> | <input type="radio"/> | <input type="radio"/> | <input type="radio"/> |
| Can small changes in physical activity be detected? | <input type="radio"/> | <input type="radio"/> | <input type="radio"/> | <input type="radio"/> | <input type="radio"/> |
| Is the sampling frequency appropriate?              | <input type="radio"/> | <input type="radio"/> | <input type="radio"/> | <input type="radio"/> | <input type="radio"/> |
| Are appropriate cut-points used?                    | <input type="radio"/> | <input type="radio"/> | <input type="radio"/> | <input type="radio"/> | <input type="radio"/> |
| Is it responsive for the setting, ability & phase?  | <input type="radio"/> | <input type="radio"/> | <input type="radio"/> | <input type="radio"/> | <input type="radio"/> |

Can you please provide a rationale for the item you ranked as most important for "Responsiveness & Sensitivity."

---



**For the category "Reliability" please rank the following considerations from most important ("1") to least important ("7") for objective physical activity measurement in stroke research.**

|                                                                                   | 1 Most important      | 2                     | 3                     | 4                     | 5                     | 6                     | 7 Least important     |
|-----------------------------------------------------------------------------------|-----------------------|-----------------------|-----------------------|-----------------------|-----------------------|-----------------------|-----------------------|
| Has the device been worn for a sufficient duration? (no. of days/week)            | <input type="radio"/> | <input type="radio"/> | <input type="radio"/> | <input type="radio"/> | <input type="radio"/> | <input type="radio"/> | <input type="radio"/> |
| Has the device been worn for a sufficient duration/ (no. of hours/day)            | <input type="radio"/> | <input type="radio"/> | <input type="radio"/> | <input type="radio"/> | <input type="radio"/> | <input type="radio"/> | <input type="radio"/> |
| Has the device been worn for a sufficient duration? (weekend days vs weekdays)    | <input type="radio"/> | <input type="radio"/> | <input type="radio"/> | <input type="radio"/> | <input type="radio"/> | <input type="radio"/> | <input type="radio"/> |
| Does the device need precise placement?                                           | <input type="radio"/> | <input type="radio"/> | <input type="radio"/> | <input type="radio"/> | <input type="radio"/> | <input type="radio"/> | <input type="radio"/> |
| Are variable levels of stroke severity and cognition likely to influence results? | <input type="radio"/> | <input type="radio"/> | <input type="radio"/> | <input type="radio"/> | <input type="radio"/> | <input type="radio"/> | <input type="radio"/> |
| Are consistent instructions provided?                                             | <input type="radio"/> | <input type="radio"/> | <input type="radio"/> | <input type="radio"/> | <input type="radio"/> | <input type="radio"/> | <input type="radio"/> |
| Is the data provided free from errors?                                            | <input type="radio"/> | <input type="radio"/> | <input type="radio"/> | <input type="radio"/> | <input type="radio"/> | <input type="radio"/> | <input type="radio"/> |

Can you please provide a rationale for the item you ranked as most important for "Reliability" for objective physical activity measurement.

---

**For the category "Reliability" please rank the following considerations from most important ("1") to least important ("8") for self-reported physical activity measurement in stroke research.**

|                                                                                                      | 1 Most important      | 2                     | 3                     | 4                     | 5                     | 6                     | 7                     | 8 Least important     |
|------------------------------------------------------------------------------------------------------|-----------------------|-----------------------|-----------------------|-----------------------|-----------------------|-----------------------|-----------------------|-----------------------|
| Are impaired memory & recall likely to influence/bias results?                                       | <input type="radio"/> | <input type="radio"/> | <input type="radio"/> | <input type="radio"/> | <input type="radio"/> | <input type="radio"/> | <input type="radio"/> | <input type="radio"/> |
| Is accuracy of reporting likely to influence results? (ie over or under reporting)                   | <input type="radio"/> | <input type="radio"/> | <input type="radio"/> | <input type="radio"/> | <input type="radio"/> | <input type="radio"/> | <input type="radio"/> | <input type="radio"/> |
| Are participants required to recall activity from a long time ago (eg past week vs past month)?      | <input type="radio"/> | <input type="radio"/> | <input type="radio"/> | <input type="radio"/> | <input type="radio"/> | <input type="radio"/> | <input type="radio"/> | <input type="radio"/> |
| Is there reliability for repeated measurements?                                                      | <input type="radio"/> | <input type="radio"/> | <input type="radio"/> | <input type="radio"/> | <input type="radio"/> | <input type="radio"/> | <input type="radio"/> | <input type="radio"/> |
| Is there good inter & intra rater reliability for questionnaires where therapists are administering? | <input type="radio"/> | <input type="radio"/> | <input type="radio"/> | <input type="radio"/> | <input type="radio"/> | <input type="radio"/> | <input type="radio"/> | <input type="radio"/> |
| Is the terminology clear, easy to understand and unambiguous?                                        | <input type="radio"/> | <input type="radio"/> | <input type="radio"/> | <input type="radio"/> | <input type="radio"/> | <input type="radio"/> | <input type="radio"/> | <input type="radio"/> |
| Are consistent instructions provided?                                                                | <input type="radio"/> | <input type="radio"/> | <input type="radio"/> | <input type="radio"/> | <input type="radio"/> | <input type="radio"/> | <input type="radio"/> | <input type="radio"/> |
| Are variable levels of stroke severity and cognition likely to influence results?                    | <input type="radio"/> | <input type="radio"/> | <input type="radio"/> | <input type="radio"/> | <input type="radio"/> | <input type="radio"/> | <input type="radio"/> | <input type="radio"/> |

Can you please provide a rationale for the item you ranked as most important for "Reliability" for self-reported physical activity measurement.

---

**For the category "Feasibility" please rank the following considerations from most important ("1") to least important ("11") for objective physical activity measurement in stroke research.**

|                                                                                                  | 1 Most imp            | 2                     | 3                     | 4                     | 5                     | 6                     | 7                     | 8                     | 9                     | 10                    | 11 Least imp          |
|--------------------------------------------------------------------------------------------------|-----------------------|-----------------------|-----------------------|-----------------------|-----------------------|-----------------------|-----------------------|-----------------------|-----------------------|-----------------------|-----------------------|
| Is the device comfortable to wear and acceptable to the participant? (eg. unobtrusive, portable) | <input type="radio"/> | <input type="radio"/> | <input type="radio"/> | <input type="radio"/> | <input type="radio"/> | <input type="radio"/> | <input type="radio"/> | <input type="radio"/> | <input type="radio"/> | <input type="radio"/> | <input type="radio"/> |
| Is the device robust (eg. waterproof, can it withstand being knocked, dropped etc)               | <input type="radio"/> | <input type="radio"/> | <input type="radio"/> | <input type="radio"/> | <input type="radio"/> | <input type="radio"/> | <input type="radio"/> | <input type="radio"/> | <input type="radio"/> | <input type="radio"/> | <input type="radio"/> |
| Can data be transmitted wirelessly?                                                              | <input type="radio"/> | <input type="radio"/> | <input type="radio"/> | <input type="radio"/> | <input type="radio"/> | <input type="radio"/> | <input type="radio"/> | <input type="radio"/> | <input type="radio"/> | <input type="radio"/> | <input type="radio"/> |
| Is the internet required to use the device or obtain data?                                       | <input type="radio"/> | <input type="radio"/> | <input type="radio"/> | <input type="radio"/> | <input type="radio"/> | <input type="radio"/> | <input type="radio"/> | <input type="radio"/> | <input type="radio"/> | <input type="radio"/> | <input type="radio"/> |
| Is the device simple & easy to use (eg. size of buttons, size of visual display, not complex)?   | <input type="radio"/> | <input type="radio"/> | <input type="radio"/> | <input type="radio"/> | <input type="radio"/> | <input type="radio"/> | <input type="radio"/> | <input type="radio"/> | <input type="radio"/> | <input type="radio"/> | <input type="radio"/> |
| Is the device easy to don and doff? (eg. put on & remove; where is it worn?)                     | <input type="radio"/> | <input type="radio"/> | <input type="radio"/> | <input type="radio"/> | <input type="radio"/> | <input type="radio"/> | <input type="radio"/> | <input type="radio"/> | <input type="radio"/> | <input type="radio"/> | <input type="radio"/> |
| Is the device costly?                                                                            | <input type="radio"/> | <input type="radio"/> | <input type="radio"/> | <input type="radio"/> | <input type="radio"/> | <input type="radio"/> | <input type="radio"/> | <input type="radio"/> | <input type="radio"/> | <input type="radio"/> | <input type="radio"/> |
| Is it a commercial device that is readily available?                                             | <input type="radio"/> | <input type="radio"/> | <input type="radio"/> | <input type="radio"/> | <input type="radio"/> | <input type="radio"/> | <input type="radio"/> | <input type="radio"/> | <input type="radio"/> | <input type="radio"/> | <input type="radio"/> |
| Is training required for specialised equipment or data analysis?                                 | <input type="radio"/> | <input type="radio"/> | <input type="radio"/> | <input type="radio"/> | <input type="radio"/> | <input type="radio"/> | <input type="radio"/> | <input type="radio"/> | <input type="radio"/> | <input type="radio"/> | <input type="radio"/> |
| Does the device have minimum wear time with good reliability? (eg. minimal participant burden)   | <input type="radio"/> | <input type="radio"/> | <input type="radio"/> | <input type="radio"/> | <input type="radio"/> | <input type="radio"/> | <input type="radio"/> | <input type="radio"/> | <input type="radio"/> | <input type="radio"/> | <input type="radio"/> |
| Does the device have a long battery life?                                                        | <input type="radio"/> | <input type="radio"/> | <input type="radio"/> | <input type="radio"/> | <input type="radio"/> | <input type="radio"/> | <input type="radio"/> | <input type="radio"/> | <input type="radio"/> | <input type="radio"/> | <input type="radio"/> |

Can you please provide a rationale for the item you ranked as most important for "Feasibility" for objective physical activity measurement.

---

**For the category "Feasibility" please rank the following considerations from most important ("1") to least important ("4") for self-reported physical activity measurement in stroke research.**

|                                                                                              | 1 Most important      | 2                     | 3                     | 4 Least important     |
|----------------------------------------------------------------------------------------------|-----------------------|-----------------------|-----------------------|-----------------------|
| Does it take the participant a long time to complete?                                        | <input type="radio"/> | <input type="radio"/> | <input type="radio"/> | <input type="radio"/> |
| Is the questionnaire simple and easy to understand? (eg. aphasia friendly)                   | <input type="radio"/> | <input type="radio"/> | <input type="radio"/> | <input type="radio"/> |
| Is education and training required for the researcher to use and interpret results?          | <input type="radio"/> | <input type="radio"/> | <input type="radio"/> | <input type="radio"/> |
| What costs are involved to use the measure? (including licencing and cost of printing forms) | <input type="radio"/> | <input type="radio"/> | <input type="radio"/> | <input type="radio"/> |

Can you please provide a rationale for the item you ranked as most important for "Feasibility" for self-reported physical activity measurement.

\_\_\_\_\_

**For the category "Ability to run Statistical Analyses" please rank the following considerations from most important ("1") to least important ("9") for physical activity measurement in stroke research .**

|                                                                                                                                             | 1 Most important      | 2                     | 3                     | 4                     | 5                     | 6                     | 7                     | 8                     | 9 Least important     |
|---------------------------------------------------------------------------------------------------------------------------------------------|-----------------------|-----------------------|-----------------------|-----------------------|-----------------------|-----------------------|-----------------------|-----------------------|-----------------------|
| Are there clear and transparent recommendations for reporting of post-processing decisions? (eg. to increase comparability between studies) | <input type="radio"/> | <input type="radio"/> | <input type="radio"/> | <input type="radio"/> | <input type="radio"/> | <input type="radio"/> | <input type="radio"/> | <input type="radio"/> | <input type="radio"/> |
| Does the device provide raw data for analysis? (ie is the data in its rawest form)                                                          | <input type="radio"/> | <input type="radio"/> | <input type="radio"/> | <input type="radio"/> | <input type="radio"/> | <input type="radio"/> | <input type="radio"/> | <input type="radio"/> | <input type="radio"/> |
| Can researchers analyse and interpret data without relying on the manufacturer for data analysis? (eg. available macro)                     | <input type="radio"/> | <input type="radio"/> | <input type="radio"/> | <input type="radio"/> | <input type="radio"/> | <input type="radio"/> | <input type="radio"/> | <input type="radio"/> | <input type="radio"/> |
| Is it clear how activity levels are differentiated within data? (ie epochs of activity and rest)                                            | <input type="radio"/> | <input type="radio"/> | <input type="radio"/> | <input type="radio"/> | <input type="radio"/> | <input type="radio"/> | <input type="radio"/> | <input type="radio"/> | <input type="radio"/> |
| What do the lowest and the highest scale values represent? Are there floor & ceiling effects of the scales?                                 | <input type="radio"/> | <input type="radio"/> | <input type="radio"/> | <input type="radio"/> | <input type="radio"/> | <input type="radio"/> | <input type="radio"/> | <input type="radio"/> | <input type="radio"/> |
| Is there a large spread of data? (ie. which makes it difficult to detect between group differences)                                         | <input type="radio"/> | <input type="radio"/> | <input type="radio"/> | <input type="radio"/> | <input type="radio"/> | <input type="radio"/> | <input type="radio"/> | <input type="radio"/> | <input type="radio"/> |
| Is there an appropriate study design and adequate sample size?                                                                              | <input type="radio"/> | <input type="radio"/> | <input type="radio"/> | <input type="radio"/> | <input type="radio"/> | <input type="radio"/> | <input type="radio"/> | <input type="radio"/> | <input type="radio"/> |
| Are the data ordinal, interval or ratio?                                                                                                    | <input type="radio"/> | <input type="radio"/> | <input type="radio"/> | <input type="radio"/> | <input type="radio"/> | <input type="radio"/> | <input type="radio"/> | <input type="radio"/> | <input type="radio"/> |
| Can data provided by the measure be summarised into one primary/secondary outcome?                                                          | <input type="radio"/> | <input type="radio"/> | <input type="radio"/> | <input type="radio"/> | <input type="radio"/> | <input type="radio"/> | <input type="radio"/> | <input type="radio"/> | <input type="radio"/> |

Can you please provide a rationale for the item you ranked as most important for "Ability to conduct statistical analyses."

---

**For the category "Relevance to the International Classification of Functioning and Disability (ICF) model" please rank the following considerations from most important ("1") to least important ("8") for physical activity measurement in stroke research.**

|                                                                                                                            | 1 Most important      | 2                     | 3                     | 4                     | 5                     | 6                     | 7                     | 8 Least important     |
|----------------------------------------------------------------------------------------------------------------------------|-----------------------|-----------------------|-----------------------|-----------------------|-----------------------|-----------------------|-----------------------|-----------------------|
| Does the measurement tool measure capacity (what someone can do) vs performance (what someone does do)?                    | <input type="radio"/> | <input type="radio"/> | <input type="radio"/> | <input type="radio"/> | <input type="radio"/> | <input type="radio"/> | <input type="radio"/> | <input type="radio"/> |
| Does the measurement tool allow analysis of relationships/links between body structure/function, activity & participation? | <input type="radio"/> | <input type="radio"/> | <input type="radio"/> | <input type="radio"/> | <input type="radio"/> | <input type="radio"/> | <input type="radio"/> | <input type="radio"/> |
| Does the measurement tool capture physical activity participation?                                                         | <input type="radio"/> | <input type="radio"/> | <input type="radio"/> | <input type="radio"/> | <input type="radio"/> | <input type="radio"/> | <input type="radio"/> | <input type="radio"/> |
| Does the measurement tool capture habitual physical activity?                                                              | <input type="radio"/> | <input type="radio"/> | <input type="radio"/> | <input type="radio"/> | <input type="radio"/> | <input type="radio"/> | <input type="radio"/> | <input type="radio"/> |
| Does the change in physical activity measured reflect changes in body structure and function?                              | <input type="radio"/> | <input type="radio"/> | <input type="radio"/> | <input type="radio"/> | <input type="radio"/> | <input type="radio"/> | <input type="radio"/> | <input type="radio"/> |
| Does the measurement tool address the impact of personal and environmental/contextual factors?                             | <input type="radio"/> | <input type="radio"/> | <input type="radio"/> | <input type="radio"/> | <input type="radio"/> | <input type="radio"/> | <input type="radio"/> | <input type="radio"/> |
| Does the domain of the ICF measured reflect the purpose of measurement and the stage of recovery?                          | <input type="radio"/> | <input type="radio"/> | <input type="radio"/> | <input type="radio"/> | <input type="radio"/> | <input type="radio"/> | <input type="radio"/> | <input type="radio"/> |
| Does the measurement tool capture changes in physical activity that are relevant to the persons goals?                     | <input type="radio"/> | <input type="radio"/> | <input type="radio"/> | <input type="radio"/> | <input type="radio"/> | <input type="radio"/> | <input type="radio"/> | <input type="radio"/> |

Can you please provide a rationale for the item you ranked as most important for "Relevance to the ICF model."

---

**The next section asks you about which Physical Activity Outcomes are important to measure.**

**Please note for the purposes of this survey, we are not considering measures of recovery of function (eg. 10m walk or balance tests), or therapy parameters (eg. resistance, speed), but rather more global measures of habitual free-living physical activity.**

**Physical activity (PA) outcomes are listed below in 4 categories (frequency of PA, intensity and duration of PA, intensity of PA and duration of PA).**

**Please note that some of these outcomes can be measured subjectively (eg. using validated questionnaires or activity diaries), some can be measured objectively (eg. using accelerometers or behavioural mapping) and some can be measured either subjectively OR objectively.**

**Under each category are related items. We would like you to**

**1) rank the related items for each category in order of importance for measurement of PA in stroke research**

**and then**

**2) rank each category in order of importance for measurement of PA in stroke research.**

**Please note you cannot rank items equally.**

**For the category "Frequency" of physical activity please rank the following outcomes from most important ("1") to least important ("8").**

|                                                                                 | 1 Most important      | 2                     | 3                     | 4                     | 5                     | 6                     | 7                     | 8 Least important     |
|---------------------------------------------------------------------------------|-----------------------|-----------------------|-----------------------|-----------------------|-----------------------|-----------------------|-----------------------|-----------------------|
| Daily step count (walking volume)                                               | <input type="radio"/> | <input type="radio"/> | <input type="radio"/> | <input type="radio"/> | <input type="radio"/> | <input type="radio"/> | <input type="radio"/> | <input type="radio"/> |
| Number of stepping bouts per day                                                | <input type="radio"/> | <input type="radio"/> | <input type="radio"/> | <input type="radio"/> | <input type="radio"/> | <input type="radio"/> | <input type="radio"/> | <input type="radio"/> |
| Average number of steps per bout                                                | <input type="radio"/> | <input type="radio"/> | <input type="radio"/> | <input type="radio"/> | <input type="radio"/> | <input type="radio"/> | <input type="radio"/> | <input type="radio"/> |
| Number of sit to stand transitions per day                                      | <input type="radio"/> | <input type="radio"/> | <input type="radio"/> | <input type="radio"/> | <input type="radio"/> | <input type="radio"/> | <input type="radio"/> | <input type="radio"/> |
| Number of sedentary bouts > 30 minutes per day                                  | <input type="radio"/> | <input type="radio"/> | <input type="radio"/> | <input type="radio"/> | <input type="radio"/> | <input type="radio"/> | <input type="radio"/> | <input type="radio"/> |
| Number of 10-minute Moderate to Vigorous Physical Activity (MVPA) bouts per day | <input type="radio"/> | <input type="radio"/> | <input type="radio"/> | <input type="radio"/> | <input type="radio"/> | <input type="radio"/> | <input type="radio"/> | <input type="radio"/> |
| Number of stairs ascended per day                                               | <input type="radio"/> | <input type="radio"/> | <input type="radio"/> | <input type="radio"/> | <input type="radio"/> | <input type="radio"/> | <input type="radio"/> | <input type="radio"/> |
| Number of activity counts (walking, transitions, stairs) per day                | <input type="radio"/> | <input type="radio"/> | <input type="radio"/> | <input type="radio"/> | <input type="radio"/> | <input type="radio"/> | <input type="radio"/> | <input type="radio"/> |

Can you please provide a rationale for the item you ranked as most important for "Frequency of physical activity."

---



**For the category "Intensity and Duration" of physical activity please rank the following outcomes from most important ("1") to least important ("8").**

|                                                                       | 1 Most important      | 2                     | 3                     | 4                     | 5                     | 6                     | 7                     | 8 Least important     |
|-----------------------------------------------------------------------|-----------------------|-----------------------|-----------------------|-----------------------|-----------------------|-----------------------|-----------------------|-----------------------|
| Time spent in Moderate to Vigorous Physical Activity (MVPA) (min/day) | <input type="radio"/> | <input type="radio"/> | <input type="radio"/> | <input type="radio"/> | <input type="radio"/> | <input type="radio"/> | <input type="radio"/> | <input type="radio"/> |
| Time spent in MVPA (min/week)                                         | <input type="radio"/> | <input type="radio"/> | <input type="radio"/> | <input type="radio"/> | <input type="radio"/> | <input type="radio"/> | <input type="radio"/> | <input type="radio"/> |
| Time spent in Light Intensity Physical Activity (LIPA) (min / day)    | <input type="radio"/> | <input type="radio"/> | <input type="radio"/> | <input type="radio"/> | <input type="radio"/> | <input type="radio"/> | <input type="radio"/> | <input type="radio"/> |
| Time spent in LIPA (min /week)                                        | <input type="radio"/> | <input type="radio"/> | <input type="radio"/> | <input type="radio"/> | <input type="radio"/> | <input type="radio"/> | <input type="radio"/> | <input type="radio"/> |
| Average MVPA bout duration (min/day)                                  | <input type="radio"/> | <input type="radio"/> | <input type="radio"/> | <input type="radio"/> | <input type="radio"/> | <input type="radio"/> | <input type="radio"/> | <input type="radio"/> |
| Time spent in 10 minute bouts of MVPA (min/day)                       | <input type="radio"/> | <input type="radio"/> | <input type="radio"/> | <input type="radio"/> | <input type="radio"/> | <input type="radio"/> | <input type="radio"/> | <input type="radio"/> |
| PA participation at home & in the community (MET-min/week)            | <input type="radio"/> | <input type="radio"/> | <input type="radio"/> | <input type="radio"/> | <input type="radio"/> | <input type="radio"/> | <input type="radio"/> | <input type="radio"/> |
| Rating of Perceived Exertion per no of minutes                        | <input type="radio"/> | <input type="radio"/> | <input type="radio"/> | <input type="radio"/> | <input type="radio"/> | <input type="radio"/> | <input type="radio"/> | <input type="radio"/> |

Can you please provide a rationale for the item you ranked as most important for "Intensity and Duration of physical activity."

---

**For the category "Intensity" of physical activity please rank the following outcomes from most important ("1") to least important ("5").**

|                                                        | 1 Most important      | 2                     | 3                     | 4                     | 5 Least important     |
|--------------------------------------------------------|-----------------------|-----------------------|-----------------------|-----------------------|-----------------------|
| Heart Rate                                             | <input type="radio"/> | <input type="radio"/> | <input type="radio"/> | <input type="radio"/> | <input type="radio"/> |
| Cadence of stepping bouts                              | <input type="radio"/> | <input type="radio"/> | <input type="radio"/> | <input type="radio"/> | <input type="radio"/> |
| Energy Expenditure - METS                              | <input type="radio"/> | <input type="radio"/> | <input type="radio"/> | <input type="radio"/> | <input type="radio"/> |
| Energy Expenditure - calories                          | <input type="radio"/> | <input type="radio"/> | <input type="radio"/> | <input type="radio"/> | <input type="radio"/> |
| Type of Physical Activity (eg. yoga, walking, jogging) | <input type="radio"/> | <input type="radio"/> | <input type="radio"/> | <input type="radio"/> | <input type="radio"/> |

Can you please provide a rationale for the item you ranked as most important for "Intensity of physical activity."

---

**For the category "Duration" of physical activity per day, please rank the following outcomes from most important ("1") to least important ("12").**

|                                                          | 1<br>Most<br>imp      | 2                     | 3                     | 4                     | 5                     | 6                     | 7                     | 8                     | 9                     | 10                    | 11                    | 12<br>Least<br>imp    |
|----------------------------------------------------------|-----------------------|-----------------------|-----------------------|-----------------------|-----------------------|-----------------------|-----------------------|-----------------------|-----------------------|-----------------------|-----------------------|-----------------------|
| Total time spent in sedentary behaviour (min/day)        | <input type="radio"/> | <input type="radio"/> | <input type="radio"/> | <input type="radio"/> | <input type="radio"/> | <input type="radio"/> | <input type="radio"/> | <input type="radio"/> | <input type="radio"/> | <input type="radio"/> | <input type="radio"/> | <input type="radio"/> |
| Total time spent in sedentary behaviour (%/day)          | <input type="radio"/> | <input type="radio"/> | <input type="radio"/> | <input type="radio"/> | <input type="radio"/> | <input type="radio"/> | <input type="radio"/> | <input type="radio"/> | <input type="radio"/> | <input type="radio"/> | <input type="radio"/> | <input type="radio"/> |
| Average sedentary bout duration (min/bout)               | <input type="radio"/> | <input type="radio"/> | <input type="radio"/> | <input type="radio"/> | <input type="radio"/> | <input type="radio"/> | <input type="radio"/> | <input type="radio"/> | <input type="radio"/> | <input type="radio"/> | <input type="radio"/> | <input type="radio"/> |
| Minutes of structured exercise (any intensity) (min/day) | <input type="radio"/> | <input type="radio"/> | <input type="radio"/> | <input type="radio"/> | <input type="radio"/> | <input type="radio"/> | <input type="radio"/> | <input type="radio"/> | <input type="radio"/> | <input type="radio"/> | <input type="radio"/> | <input type="radio"/> |
| Habitual weekly minutes of physical activity(min/week)   | <input type="radio"/> | <input type="radio"/> | <input type="radio"/> | <input type="radio"/> | <input type="radio"/> | <input type="radio"/> | <input type="radio"/> | <input type="radio"/> | <input type="radio"/> | <input type="radio"/> | <input type="radio"/> | <input type="radio"/> |
| Time spent sitting (min/day)                             | <input type="radio"/> | <input type="radio"/> | <input type="radio"/> | <input type="radio"/> | <input type="radio"/> | <input type="radio"/> | <input type="radio"/> | <input type="radio"/> | <input type="radio"/> | <input type="radio"/> | <input type="radio"/> | <input type="radio"/> |
| Time spent lying / reclining (min/day)                   | <input type="radio"/> | <input type="radio"/> | <input type="radio"/> | <input type="radio"/> | <input type="radio"/> | <input type="radio"/> | <input type="radio"/> | <input type="radio"/> | <input type="radio"/> | <input type="radio"/> | <input type="radio"/> | <input type="radio"/> |
| Time spent standing (min/day)                            | <input type="radio"/> | <input type="radio"/> | <input type="radio"/> | <input type="radio"/> | <input type="radio"/> | <input type="radio"/> | <input type="radio"/> | <input type="radio"/> | <input type="radio"/> | <input type="radio"/> | <input type="radio"/> | <input type="radio"/> |
| Time spent walking (min/day)                             | <input type="radio"/> | <input type="radio"/> | <input type="radio"/> | <input type="radio"/> | <input type="radio"/> | <input type="radio"/> | <input type="radio"/> | <input type="radio"/> | <input type="radio"/> | <input type="radio"/> | <input type="radio"/> | <input type="radio"/> |
| Time spent ascending / descending stairs (min/day)       | <input type="radio"/> | <input type="radio"/> | <input type="radio"/> | <input type="radio"/> | <input type="radio"/> | <input type="radio"/> | <input type="radio"/> | <input type="radio"/> | <input type="radio"/> | <input type="radio"/> | <input type="radio"/> | <input type="radio"/> |
| Time spent running (min/day)                             | <input type="radio"/> | <input type="radio"/> | <input type="radio"/> | <input type="radio"/> | <input type="radio"/> | <input type="radio"/> | <input type="radio"/> | <input type="radio"/> | <input type="radio"/> | <input type="radio"/> | <input type="radio"/> | <input type="radio"/> |
| Time on feet (min/day)                                   | <input type="radio"/> | <input type="radio"/> | <input type="radio"/> | <input type="radio"/> | <input type="radio"/> | <input type="radio"/> | <input type="radio"/> | <input type="radio"/> | <input type="radio"/> | <input type="radio"/> | <input type="radio"/> | <input type="radio"/> |

Can you please provide a rationale for the item you ranked as most important for "Duration of physical activity."

---

**Now please rank each physical activity outcome category in order of importance to measure in Stroke Research.**

|                                             | 1 Most important      | 2                     | 3                     | 4 Least important     |
|---------------------------------------------|-----------------------|-----------------------|-----------------------|-----------------------|
| Frequency of physical activity              | <input type="radio"/> | <input type="radio"/> | <input type="radio"/> | <input type="radio"/> |
| Intensity and duration of physical activity | <input type="radio"/> | <input type="radio"/> | <input type="radio"/> | <input type="radio"/> |
| Intensity of physical activity              | <input type="radio"/> | <input type="radio"/> | <input type="radio"/> | <input type="radio"/> |
| Duration of physical activity               | <input type="radio"/> | <input type="radio"/> | <input type="radio"/> | <input type="radio"/> |

---

Can you please provide a rationale for the item you ranked as most important for "physical activity outcome category."

\_\_\_\_\_

---

Do you have any comments to add?

\_\_\_\_\_



|                                                                             |                       |                       |                       |                       |                       |                       |                       |                       |                       |
|-----------------------------------------------------------------------------|-----------------------|-----------------------|-----------------------|-----------------------|-----------------------|-----------------------|-----------------------|-----------------------|-----------------------|
| Can you capture non-ambulatory physical activity?                           | <input type="radio"/> | <input type="radio"/> | <input type="radio"/> | <input type="radio"/> | <input type="radio"/> | <input type="radio"/> | <input type="radio"/> | <input type="radio"/> | <input type="radio"/> |
| Can you identify the context and setting the physical activity occurred in? | <input type="radio"/> | <input type="radio"/> | <input type="radio"/> | <input type="radio"/> | <input type="radio"/> | <input type="radio"/> | <input type="radio"/> | <input type="radio"/> | <input type="radio"/> |
| Is the measure generalisable across a wide range of patients?               | <input type="radio"/> | <input type="radio"/> | <input type="radio"/> | <input type="radio"/> | <input type="radio"/> | <input type="radio"/> | <input type="radio"/> | <input type="radio"/> | <input type="radio"/> |

---

Can you please provide a rationale for the item you ranked as most important for "Relevance of the measurement tool's intended purpose to its intended use (construct validity)."

---

**For the category "Responsiveness & Sensitivity" please rank the following considerations from most important ("1") to least important ("5") for physical activity measurement in stroke clinical practice.**

|                                                                                                    | 1 Most important      | 2                     | 3                     | 4                     | 5 Least important     |
|----------------------------------------------------------------------------------------------------|-----------------------|-----------------------|-----------------------|-----------------------|-----------------------|
| Is the epoch length appropriate? (epoch the length of time between recording acceleration signals) | <input type="radio"/> | <input type="radio"/> | <input type="radio"/> | <input type="radio"/> | <input type="radio"/> |
| Can the measure detect a clinically important change in activity levels?                           | <input type="radio"/> | <input type="radio"/> | <input type="radio"/> | <input type="radio"/> | <input type="radio"/> |
| Is the measure specific to the patient and aligned to their goals?                                 | <input type="radio"/> | <input type="radio"/> | <input type="radio"/> | <input type="radio"/> | <input type="radio"/> |
| Is there a stable period to allow a baseline measurement be obtained?                              | <input type="radio"/> | <input type="radio"/> | <input type="radio"/> | <input type="radio"/> | <input type="radio"/> |
| Can the measure detect change in slow walkers or those using an aid?                               | <input type="radio"/> | <input type="radio"/> | <input type="radio"/> | <input type="radio"/> | <input type="radio"/> |

Can you please provide a rationale for the item you ranked as most important for "Responsiveness & Sensitivity."

---

**For the category "Reliability" please rank the following considerations from most important ("1") to least important ("7") for objective physical activity measurement in stroke clinical practice.**

|                                                                                                                                 | 1 Most important      | 2                     | 3                     | 4                     | 5                     | 6                     | 7 Least important     |
|---------------------------------------------------------------------------------------------------------------------------------|-----------------------|-----------------------|-----------------------|-----------------------|-----------------------|-----------------------|-----------------------|
| Is physical activity being measured for appropriate duration? (eg. how many hours/day, how many days/week, weekday vs weekend?) | <input type="radio"/> | <input type="radio"/> | <input type="radio"/> | <input type="radio"/> | <input type="radio"/> | <input type="radio"/> | <input type="radio"/> |
| Is the device worn consistently?                                                                                                | <input type="radio"/> | <input type="radio"/> | <input type="radio"/> | <input type="radio"/> | <input type="radio"/> | <input type="radio"/> | <input type="radio"/> |
| Are the measurement environments the same - eg. home vs clinic vs community?                                                    | <input type="radio"/> | <input type="radio"/> | <input type="radio"/> | <input type="radio"/> | <input type="radio"/> | <input type="radio"/> | <input type="radio"/> |
| Can the device accurately capture physical activity for people using gait aids or those with slow walking speeds?               | <input type="radio"/> | <input type="radio"/> | <input type="radio"/> | <input type="radio"/> | <input type="radio"/> | <input type="radio"/> | <input type="radio"/> |
| Are there formal procedures for data handling?                                                                                  | <input type="radio"/> | <input type="radio"/> | <input type="radio"/> | <input type="radio"/> | <input type="radio"/> | <input type="radio"/> | <input type="radio"/> |
| Is there reliability for repeated measurements?                                                                                 | <input type="radio"/> | <input type="radio"/> | <input type="radio"/> | <input type="radio"/> | <input type="radio"/> | <input type="radio"/> | <input type="radio"/> |
| Have clinicians/personnel received training on procedure & interpretation (inter-rater reliability)?                            | <input type="radio"/> | <input type="radio"/> | <input type="radio"/> | <input type="radio"/> | <input type="radio"/> | <input type="radio"/> | <input type="radio"/> |

Can you please provide a rationale for the item you ranked as most important for "Reliability" for objective physical activity measurement.

---



**For the category "Reliability" please rank the following considerations from most important ("1") to least important ("7") for self-reported physical activity measurement in stroke clinical practice.**

|                                                                                                        | 1 Most important      | 2                     | 3                     | 4                     | 5                     | 6                     | 7 Least important     |
|--------------------------------------------------------------------------------------------------------|-----------------------|-----------------------|-----------------------|-----------------------|-----------------------|-----------------------|-----------------------|
| Are impaired memory and recall likely to be issues?                                                    | <input type="radio"/> | <input type="radio"/> | <input type="radio"/> | <input type="radio"/> | <input type="radio"/> | <input type="radio"/> | <input type="radio"/> |
| Is the same person administering test?                                                                 | <input type="radio"/> | <input type="radio"/> | <input type="radio"/> | <input type="radio"/> | <input type="radio"/> | <input type="radio"/> | <input type="radio"/> |
| Is adequate completion likely to be an issue? (eg activity diaries, long questionnaire)                | <input type="radio"/> | <input type="radio"/> | <input type="radio"/> | <input type="radio"/> | <input type="radio"/> | <input type="radio"/> | <input type="radio"/> |
| Is the data recording method appropriate eg paper based vs interview vs online?                        | <input type="radio"/> | <input type="radio"/> | <input type="radio"/> | <input type="radio"/> | <input type="radio"/> | <input type="radio"/> | <input type="radio"/> |
| Have clinicians/personnel received training on procedure and interpretation (inter-rater reliability)? | <input type="radio"/> | <input type="radio"/> | <input type="radio"/> | <input type="radio"/> | <input type="radio"/> | <input type="radio"/> | <input type="radio"/> |
| Is there reliability for repeated measurements?                                                        | <input type="radio"/> | <input type="radio"/> | <input type="radio"/> | <input type="radio"/> | <input type="radio"/> | <input type="radio"/> | <input type="radio"/> |
| Is the terminology easy to understand and are the instructions clear?                                  | <input type="radio"/> | <input type="radio"/> | <input type="radio"/> | <input type="radio"/> | <input type="radio"/> | <input type="radio"/> | <input type="radio"/> |

Can you please provide a rationale for the item you ranked as most important for "Reliability" for self-reported physical activity measurement.

---

**For the category "Feasibility" please rank the following considerations from most important ("1") to least important ("11") for objective physical activity measurement in stroke clinical practice.**

|                                                                                    | 1 Most imp            | 2                     | 3                     | 4                     | 5                     | 6                     | 7                     | 8                     | 9                     | 10                    | 11 Least imp          |
|------------------------------------------------------------------------------------|-----------------------|-----------------------|-----------------------|-----------------------|-----------------------|-----------------------|-----------------------|-----------------------|-----------------------|-----------------------|-----------------------|
| Is the device costly?                                                              | <input type="radio"/> | <input type="radio"/> | <input type="radio"/> | <input type="radio"/> | <input type="radio"/> | <input type="radio"/> | <input type="radio"/> | <input type="radio"/> | <input type="radio"/> | <input type="radio"/> | <input type="radio"/> |
| Is it an everyday commercial device that is readily available?                     | <input type="radio"/> | <input type="radio"/> | <input type="radio"/> | <input type="radio"/> | <input type="radio"/> | <input type="radio"/> | <input type="radio"/> | <input type="radio"/> | <input type="radio"/> | <input type="radio"/> | <input type="radio"/> |
| Is the device simple & easy to use (for the patient)?                              | <input type="radio"/> | <input type="radio"/> | <input type="radio"/> | <input type="radio"/> | <input type="radio"/> | <input type="radio"/> | <input type="radio"/> | <input type="radio"/> | <input type="radio"/> | <input type="radio"/> | <input type="radio"/> |
| Is the device simple & easy to use (for the clinician)?                            | <input type="radio"/> | <input type="radio"/> | <input type="radio"/> | <input type="radio"/> | <input type="radio"/> | <input type="radio"/> | <input type="radio"/> | <input type="radio"/> | <input type="radio"/> | <input type="radio"/> | <input type="radio"/> |
| Is the device easy to don and doff? (eg. put on & remove; where is it worn?)       | <input type="radio"/> | <input type="radio"/> | <input type="radio"/> | <input type="radio"/> | <input type="radio"/> | <input type="radio"/> | <input type="radio"/> | <input type="radio"/> | <input type="radio"/> | <input type="radio"/> | <input type="radio"/> |
| How comfortable is the device to wear? Is it obtrusive?                            | <input type="radio"/> | <input type="radio"/> | <input type="radio"/> | <input type="radio"/> | <input type="radio"/> | <input type="radio"/> | <input type="radio"/> | <input type="radio"/> | <input type="radio"/> | <input type="radio"/> | <input type="radio"/> |
| Is education and training required for the therapist to use and interpret results? | <input type="radio"/> | <input type="radio"/> | <input type="radio"/> | <input type="radio"/> | <input type="radio"/> | <input type="radio"/> | <input type="radio"/> | <input type="radio"/> | <input type="radio"/> | <input type="radio"/> | <input type="radio"/> |
| Are clinicians open to using the device (potential change in practice)?            | <input type="radio"/> | <input type="radio"/> | <input type="radio"/> | <input type="radio"/> | <input type="radio"/> | <input type="radio"/> | <input type="radio"/> | <input type="radio"/> | <input type="radio"/> | <input type="radio"/> | <input type="radio"/> |
| Does the device have a long battery life?                                          | <input type="radio"/> | <input type="radio"/> | <input type="radio"/> | <input type="radio"/> | <input type="radio"/> | <input type="radio"/> | <input type="radio"/> | <input type="radio"/> | <input type="radio"/> | <input type="radio"/> | <input type="radio"/> |
| Does the device have GPS capabilities?                                             | <input type="radio"/> | <input type="radio"/> | <input type="radio"/> | <input type="radio"/> | <input type="radio"/> | <input type="radio"/> | <input type="radio"/> | <input type="radio"/> | <input type="radio"/> | <input type="radio"/> | <input type="radio"/> |
| Does the device have minimum wear time with good reliability?                      | <input type="radio"/> | <input type="radio"/> | <input type="radio"/> | <input type="radio"/> | <input type="radio"/> | <input type="radio"/> | <input type="radio"/> | <input type="radio"/> | <input type="radio"/> | <input type="radio"/> | <input type="radio"/> |

Can you please provide a rationale for the item you ranked as most important for "Feasibility" for objective physical activity measurement.

\_\_\_\_\_

**For the category "Feasibility" please rank the following considerations from most important ("1") to least important ("5") for self-reported physical activity measurement in stroke clinical practice.**

|                                                                                    | 1 Most important      | 2                     | 3                     | 4                     | 5 Least important     |
|------------------------------------------------------------------------------------|-----------------------|-----------------------|-----------------------|-----------------------|-----------------------|
| Does it take the patient a long time to complete?                                  | <input type="radio"/> | <input type="radio"/> | <input type="radio"/> | <input type="radio"/> | <input type="radio"/> |
| Is it time consuming for the clinician to administer?                              | <input type="radio"/> | <input type="radio"/> | <input type="radio"/> | <input type="radio"/> | <input type="radio"/> |
| Is the questionnaire simple and easy to understand?                                | <input type="radio"/> | <input type="radio"/> | <input type="radio"/> | <input type="radio"/> | <input type="radio"/> |
| Is education and training required for the therapist to use and interpret results? | <input type="radio"/> | <input type="radio"/> | <input type="radio"/> | <input type="radio"/> | <input type="radio"/> |
| Is it freely available to use?                                                     | <input type="radio"/> | <input type="radio"/> | <input type="radio"/> | <input type="radio"/> | <input type="radio"/> |

Can you please provide a rationale for the item you ranked as most important for "Feasibility" for self-reported physical activity measurement.

---

**For the category "Ability to run Statistical Analyses" please rank the following considerations from most important ("1") to least important ("9") for physical activity measurement in stroke clinical practice.**

|                                                                                                    | 1 Most important      | 2                     | 3                     | 4                     | 5                     | 6                     | 7                     | 8                     | 9 Least important     |
|----------------------------------------------------------------------------------------------------|-----------------------|-----------------------|-----------------------|-----------------------|-----------------------|-----------------------|-----------------------|-----------------------|-----------------------|
| Is normative data available (to enable the clinician to understand clinical meaning)?              | <input type="radio"/> | <input type="radio"/> | <input type="radio"/> | <input type="radio"/> | <input type="radio"/> | <input type="radio"/> | <input type="radio"/> | <input type="radio"/> | <input type="radio"/> |
| Is normative data available across the lifespan?                                                   | <input type="radio"/> | <input type="radio"/> | <input type="radio"/> | <input type="radio"/> | <input type="radio"/> | <input type="radio"/> | <input type="radio"/> | <input type="radio"/> | <input type="radio"/> |
| Is gender specific normative data available?                                                       | <input type="radio"/> | <input type="radio"/> | <input type="radio"/> | <input type="radio"/> | <input type="radio"/> | <input type="radio"/> | <input type="radio"/> | <input type="radio"/> | <input type="radio"/> |
| Is cleaning of data required?                                                                      | <input type="radio"/> | <input type="radio"/> | <input type="radio"/> | <input type="radio"/> | <input type="radio"/> | <input type="radio"/> | <input type="radio"/> | <input type="radio"/> | <input type="radio"/> |
| Do the statistical analyses take a long time to run?                                               | <input type="radio"/> | <input type="radio"/> | <input type="radio"/> | <input type="radio"/> | <input type="radio"/> | <input type="radio"/> | <input type="radio"/> | <input type="radio"/> | <input type="radio"/> |
| Is extra training in or knowledge of statistical analyses required?                                | <input type="radio"/> | <input type="radio"/> | <input type="radio"/> | <input type="radio"/> | <input type="radio"/> | <input type="radio"/> | <input type="radio"/> | <input type="radio"/> | <input type="radio"/> |
| Does the statistical analyses result in a quick and easy display of results (eg in a bar graph)?   | <input type="radio"/> | <input type="radio"/> | <input type="radio"/> | <input type="radio"/> | <input type="radio"/> | <input type="radio"/> | <input type="radio"/> | <input type="radio"/> | <input type="radio"/> |
| Are the algorithms used valid for a stroke population?                                             | <input type="radio"/> | <input type="radio"/> | <input type="radio"/> | <input type="radio"/> | <input type="radio"/> | <input type="radio"/> | <input type="radio"/> | <input type="radio"/> | <input type="radio"/> |
| As a clinician I don't think the ability to run statistical analyses is an important consideration | <input type="radio"/> | <input type="radio"/> | <input type="radio"/> | <input type="radio"/> | <input type="radio"/> | <input type="radio"/> | <input type="radio"/> | <input type="radio"/> | <input type="radio"/> |

Can you please provide a rationale for the item you ranked as most important for "Ability to conduct statistical analyses."

---

**For the category "Relevance to the International Classification of Functioning and Disability (ICF) model" please rank the following considerations from most important ("1") to least important ("7") for physical activity measurement in stroke clinical practice.**

|                                                                                                | 1 Most important      | 2                     | 3                     | 4                     | 5                     | 6                     | 7 Least important     |
|------------------------------------------------------------------------------------------------|-----------------------|-----------------------|-----------------------|-----------------------|-----------------------|-----------------------|-----------------------|
| Does the measurement tool capture changes in activity that are relevant to the persons goals?  | <input type="radio"/> | <input type="radio"/> | <input type="radio"/> | <input type="radio"/> | <input type="radio"/> | <input type="radio"/> | <input type="radio"/> |
| Does the measurement tool capture habitual activity?                                           | <input type="radio"/> | <input type="radio"/> | <input type="radio"/> | <input type="radio"/> | <input type="radio"/> | <input type="radio"/> | <input type="radio"/> |
| Does the measurement tool truly capture physical activity participation?                       | <input type="radio"/> | <input type="radio"/> | <input type="radio"/> | <input type="radio"/> | <input type="radio"/> | <input type="radio"/> | <input type="radio"/> |
| Does the change in physical activity measured reflect changes in body structure and function?  | <input type="radio"/> | <input type="radio"/> | <input type="radio"/> | <input type="radio"/> | <input type="radio"/> | <input type="radio"/> | <input type="radio"/> |
| Does the measurement tool address the impact of personal and environmental/contextual factors? | <input type="radio"/> | <input type="radio"/> | <input type="radio"/> | <input type="radio"/> | <input type="radio"/> | <input type="radio"/> | <input type="radio"/> |
| Does the measurement tool address cultural variations?                                         | <input type="radio"/> | <input type="radio"/> | <input type="radio"/> | <input type="radio"/> | <input type="radio"/> | <input type="radio"/> | <input type="radio"/> |
| Does the measurement tool note when help from others is required?                              | <input type="radio"/> | <input type="radio"/> | <input type="radio"/> | <input type="radio"/> | <input type="radio"/> | <input type="radio"/> | <input type="radio"/> |

Can you please provide a rationale for the item you ranked as most important for "Relevance to the ICF model."

---

**This next section asks you about which Physical Activity Outcomes are important to measure.**

**Please note for the purposes of this survey, we are not considering measures of recovery of function (eg. 10m walk or balance tests), or therapy parameters (eg. resistance, speed), but rather more global measures of habitual free-living physical activity.**

**Physical activity (PA) outcomes are listed below in 4 categories (frequency of PA, intensity and duration of PA, intensity of PA and duration of PA).**

**Please note that some of these outcomes can be measured subjectively (eg. using validated questionnaires or activity diaries), some can be measured objectively (eg. using accelerometers or behavioural mapping) and some can be measured either subjectively OR objectively.**

**Under each category are related items. We would like you to**

**1) rank the related items for each category in order of importance for measurement of PA in stroke clinical practice**

**and then**

**2) rank each category in order of importance for measurement of PA in stroke clinical practice**

**Please note you cannot rank items equally.**

**For the category "Frequency" of physical activity please rank the following outcomes from most important to least important.**

|                                                               | Most important        | Least important       |
|---------------------------------------------------------------|-----------------------|-----------------------|
| Daily step count                                              | <input type="radio"/> | <input type="radio"/> |
| Frequency of purposeful activity / exercise (eg. self-report) | <input type="radio"/> | <input type="radio"/> |

---

Can you please provide a rationale for the item you ranked as most important for "Frequency of Physical Activity."

---

**For the category "Intensity and Duration" of physical activity please rank the following outcomes from most important ("1") to least important ("6").**

|                                                                   | 1 Most important      | 2                     | 3                     | 4                     | 5                     | 6 Least important     |
|-------------------------------------------------------------------|-----------------------|-----------------------|-----------------------|-----------------------|-----------------------|-----------------------|
| Time spent in Moderate to Vigorous Physical Activity (MVPA) daily | <input type="radio"/> | <input type="radio"/> | <input type="radio"/> | <input type="radio"/> | <input type="radio"/> | <input type="radio"/> |
| Time spent in MVPA weekly                                         | <input type="radio"/> | <input type="radio"/> | <input type="radio"/> | <input type="radio"/> | <input type="radio"/> | <input type="radio"/> |
| Time spent in Light Intensity Physical Activity (LIPA) daily      | <input type="radio"/> | <input type="radio"/> | <input type="radio"/> | <input type="radio"/> | <input type="radio"/> | <input type="radio"/> |
| Time spent in target Heart Rate ranges per week                   | <input type="radio"/> | <input type="radio"/> | <input type="radio"/> | <input type="radio"/> | <input type="radio"/> | <input type="radio"/> |
| Duration of weekly exercise that increases Heart Rate             | <input type="radio"/> | <input type="radio"/> | <input type="radio"/> | <input type="radio"/> | <input type="radio"/> | <input type="radio"/> |
| Time spent in 10 minute bouts of MVPA per day                     | <input type="radio"/> | <input type="radio"/> | <input type="radio"/> | <input type="radio"/> | <input type="radio"/> | <input type="radio"/> |

Can you please provide a rationale for the item you ranked as most important for "Intensity and Duration of physical activity.

---



**For the category "Intensity" of physical activity please rank the following outcomes from most important ("1") to least important ("5").**

|                                                        | 1 Most important      | 2                     | 3                     | 4                     | 5 Least important     |
|--------------------------------------------------------|-----------------------|-----------------------|-----------------------|-----------------------|-----------------------|
| Rating of Perceived Exertion                           | <input type="radio"/> | <input type="radio"/> | <input type="radio"/> | <input type="radio"/> | <input type="radio"/> |
| Energy Expenditure                                     | <input type="radio"/> | <input type="radio"/> | <input type="radio"/> | <input type="radio"/> | <input type="radio"/> |
| Heart Rate                                             | <input type="radio"/> | <input type="radio"/> | <input type="radio"/> | <input type="radio"/> | <input type="radio"/> |
| Blood Pressure                                         | <input type="radio"/> | <input type="radio"/> | <input type="radio"/> | <input type="radio"/> | <input type="radio"/> |
| Type of Physical Activity (eg. yoga, walking, jogging) | <input type="radio"/> | <input type="radio"/> | <input type="radio"/> | <input type="radio"/> | <input type="radio"/> |

---

Can you please provide a rationale for the item you ranked as most important for "Intensity of physical activity."

---

**For the category "Duration" of physical activity per day please rank the following outcomes from most important ("1") to least important ("7").**

|                                          | 1 Most important      | 2                     | 3                     | 4                     | 5                     | 6                     | 7 Least important     |
|------------------------------------------|-----------------------|-----------------------|-----------------------|-----------------------|-----------------------|-----------------------|-----------------------|
| Daily minutes of Physical Activity       | <input type="radio"/> | <input type="radio"/> | <input type="radio"/> | <input type="radio"/> | <input type="radio"/> | <input type="radio"/> | <input type="radio"/> |
| Time spent sitting out of bed            | <input type="radio"/> | <input type="radio"/> | <input type="radio"/> | <input type="radio"/> | <input type="radio"/> | <input type="radio"/> | <input type="radio"/> |
| Time spent standing & walking            | <input type="radio"/> | <input type="radio"/> | <input type="radio"/> | <input type="radio"/> | <input type="radio"/> | <input type="radio"/> | <input type="radio"/> |
| Time spent lying                         | <input type="radio"/> | <input type="radio"/> | <input type="radio"/> | <input type="radio"/> | <input type="radio"/> | <input type="radio"/> | <input type="radio"/> |
| Sedentary time                           | <input type="radio"/> | <input type="radio"/> | <input type="radio"/> | <input type="radio"/> | <input type="radio"/> | <input type="radio"/> | <input type="radio"/> |
| Sedentary time vs active time as a ratio | <input type="radio"/> | <input type="radio"/> | <input type="radio"/> | <input type="radio"/> | <input type="radio"/> | <input type="radio"/> | <input type="radio"/> |
| Time spent in continuous exercise        | <input type="radio"/> | <input type="radio"/> | <input type="radio"/> | <input type="radio"/> | <input type="radio"/> | <input type="radio"/> | <input type="radio"/> |

Can you please provide a rationale for the item you ranked as most important for "Duration of physical activity."

---

**Now please rank each "physical activity outcome category" in order of importance to measure in Stroke Clinical Practice.**

|                                             | 1 Most important      | 2                     | 3                     | 4 Least important     |
|---------------------------------------------|-----------------------|-----------------------|-----------------------|-----------------------|
| Frequency of physical activity              | <input type="radio"/> | <input type="radio"/> | <input type="radio"/> | <input type="radio"/> |
| Intensity and duration of physical activity | <input type="radio"/> | <input type="radio"/> | <input type="radio"/> | <input type="radio"/> |
| Intensity of physical activity              | <input type="radio"/> | <input type="radio"/> | <input type="radio"/> | <input type="radio"/> |
| Duration of physical activity               | <input type="radio"/> | <input type="radio"/> | <input type="radio"/> | <input type="radio"/> |

---

Can you please provide a rationale for the item you ranked as most important for "physical activity outcome category."

\_\_\_\_\_

---

Do you have any comments to add?

\_\_\_\_\_

### Survey 3 - Researchers & Clinicians

#### **Information for Participants - Survey Results**

**The attached document outlines the results of the previous survey where you were asked to identify key elements to consider for post stroke physical activity measurement in research or clinical practice related to six categories. You were asked to comment as a research or clinical practice expert. We have attached the results for you to review to inform your responses to the final survey.**

Please read the attached survey results

#### **Information for Participants - Compiled Information about Physical Activity Devices and Questionnaires used in Stroke**

**The research team have completed a brief literature search of all the measurement tools listed by survey respondents and their use in stroke. We were particularly interested in information related to the tools' psychometric properties. We found literature on 11 devices and 10 questionnaires.**

**In the attached document (excel spreadsheet) we have summarised information relevant to the key elements to consider for post stroke physical activity measurement in research or clinical practice.**

**We would like you to review this information and then answer the questions on the following pages. Please note there are separate tabs for devices and questionnaires.**

Please review the information in the attached excel document

#### **Research Team Consensus Recommendations**

**The research team have reviewed the survey responses from expert researchers and clinicians and the literature provided. In conjunction with this information and our collective expert knowledge and experience, we have come to the following consensus about which devices and questionnaires appear to be the most robust and useful measurement tools for physical activity measurement after stroke.**

##### **Devices:**

**For research use:**

**To measure physical activity intensity (eg. energy expenditure) accelerometers are best and the Actigraph, Actical & Activ8 are devices we would recommend.**

**To measure physical activity duration (eg time spent in postures) we recommend using the ActivPAL device.**

**To measure physical activity frequency (eg. step count): the Step Activity Monitor is the gold standard for step count and we would recommend using this device.**

**For clinical use (or pragmatic research):**

**We would recommend using the Fitbit (worn on the ankle for research) for measuring physical activity (frequency, intensity and duration) in clinical practice and pragmatic research.**

**Questionnaires:**

**Four questionnaires came out with good construct validity which the research team thought was most important item. These were the International Physical Activity Questionnaire (IPAQ); Physical Activity Scale for the Elderly (PASE); Physician-based Assessment and Counselling for Exercise score (PACE) and the Stroke Physical Activity Questionnaire.**

**We recommend 2 of these questionnaires as in addition they scored highly for feasibility and ability to run statistics the IPAQ (short form) and the PASE.**

**The Stroke Physical Activity Questionnaire is a relatively new questionnaire & appears to be well developed from a psychometric perspective. We would recommend considering this tool as more research using this tool is published. Please note we have attached a version of this questionnaire below for your interest.**

**Caveat**

**The research team note however that the use of each tool will depend specifically on the purpose of physical activity measurement, knowledge of the users and resources available. Hence, this is simply a guide compiled by our expert group. We also note that currently to obtain a complete picture of physical activity, both devices and questionnaires are required as neither captures all elements of physical activity.**

---

1a Is this information we have provided useful for your research or clinical practice?

Yes

No

---

1b Why was this information useful / not useful?

---

2a Is there anything you would add to the information we have provided?

- Yes
- No

---

2b If yes, what specifically would you add?

---

3a Is there any information that you would remove?

- Yes
- No

---

3b If yes, what information specifically would you remove?

---

4a Considering all of the information provided in your opinion do you agree with our recommendations?

- Yes - I agree with all recommendations
- Yes, I agree with device recommendations only
- Yes, I agree with questionnaire recommendations only
- No, I do not agree with any recommendations

---

4b If you do not agree with one or all of our recommendations, please state which you do not agree with & provide a rationale for your choices / position.
